# Supplementary material for: Changes in the occurrence of children’s asthma after the 2019 revision of the Health Promotion Act preventing passive smoking in Japan: interrupted time-series analyses
Source: Research Square preprint supplement (doi:10.21203/rs.3.rs-6917732/v1), 2025-09-18
Supplement: Supplementary file 1 [file b04af0bb57773e07ea4c74c1.doc]

**Supplementary Materials**

**Supplementary Table 1.** Definitions of the diseases

| **Disease** | **ICD-10 code** |
| --- | --- |
| SIDS | R95 |
| Asthma | J45, J46 |

**Supplementary Table 2.** Definitions of medications for severe asthma

| **Category** | **Class of medication** |
| --- | --- |
| Short acting *β*2 agonist | Fenoterol hydrobromide |
| Procaterol hydrochloride |
| Salbutamol sulfate |
| Terbutaline sulfate |
| Theophylline (injection) | Aminophylline |
| Steroid (injection) | Betamethasone |
| Dexamethasone sodium phosphate |
| Hydrocortisone sodium succinate |
| Methylprednisolone acetate |
| Methylprednisolone sodium succinate |

**Supplementary Table 3**. Monthly changes in the occurrence among patients aged younger than six years who were hospitalized for asthma between June 2018 and February 2020

| The monthly occurrence among patients aged younger than six years who were hospitalized for asthma between June 2018 and February 2020 using the interrupted time-series analysis | Coefficient | 95% confidence interval | | *p* |
| --- | --- | --- | --- | --- |
| Slope before the first policy introduction | -2.7 | -8.4 | 3.1 | .34 |
| Level change after the first policy introduction | -0.8 | -26.0 | 24 | .94 |
| Slope change of the first policy | 6.4 | -4.4 | 17 | .23 |
| Slope after the first policy introduction | 3.7 | -3.8 | 11 | .31 |
| Level change after the second policy introduction | 8.2 | -25.0 | 41 | .60 |
| Slope change of the second policy | -7.3 | -17.0 | 2.8 | .14 |
| Slope after the second policy introduction | -3.5 | -8.7 | 1.6 | .17 |

Durbin–Watson statistic (original) = 1.15; Durbin–Watson statistic (transformed) = 1.43

**Supplementary Table 4.** Monthly changes in the occurrence among patients aged younger than six years who received medication for severe asthma at outpatient settings between June 2018 and February 2020

| The monthly occurrence among patients aged younger than six years who received medication for severe asthma at outpatient settings between June 2018 and February 2020 using the interrupted time-series analysis | Coefficient | 95% confidence interval | | *p* |
| --- | --- | --- | --- | --- |
| Slope before the first policy introduction | 10 | -77 | 98 | .81 |
| Level change after the first policy introduction | -25 | -436 | 385 | .90 |
| Slope change of the first policy | -22 | -166 | 123 | .76 |
| Slope after the first policy introduction | -11 | -85 | 62 | .75 |
| Level change after the second policy introduction | 63 | -196 | 321 | .61 |
| Slope change of the second policy | -6 | -95 | 107 | .90 |
| Slope after the second policy introduction | -5 | -61 | 50 | .84 |

Durbin–Watson statistic (original) = 1.24; Durbin–Watson statistic (transformed) = 1.58

**Supplementary Table 5**. Monthly changes in the occurrence among patients aged younger than six years who were hospitalized for asthma between April 2017 and September 2019 using the interrupted time-series analysis with the intervention of July 2018

| The monthly occurrence among patients aged younger than six years who were hospitalized for asthma between April 2017 and September 2019 using the interrupted time-series analysis with the intervention of July 2018 | Coefficient | 95% confidence interval | | *p* |
| --- | --- | --- | --- | --- |
| Slope before the introduction | -0.3 | -2.2 | 1.5 | .71 |
| Level change after the policy introduction | 3.5 | -11.3 | 18.2 | .63 |
| Slope change of the policy | 1.7 | -2.6 | 6.1 | .42 |
| Slope after the policy introduction | 1.4 | -1.8 | 4.6 | .37 |

Durbin–Watson statistic (original) = 0.76; Durbin–Watson statistic (transformed) = 1.23

**Supplementary Table 6.** Monthly changes in the occurrence among patients aged younger than six years who received medication for severe asthma at outpatient settings between April 2017 and September 2019 using the interrupted time-series analysis with the intervention of July 2018

| The monthly occurrence among patients aged younger than six years who received medication for severe asthma at outpatient settings between April 2017 and September 2019 using the interrupted time-series analysis with the intervention of July 2018 | Coefficient | 95% confidence interval | | *p* |
| --- | --- | --- | --- | --- |
| Slope before the policy introduction | 0.8 | -13 | 14 | 0.91 |
| Level change after the policy introduction | 77 | -189 | 343 | 0.56 |
| Slope change of the policy | -0.8 | -38 | 37 | 0.97 |
| Slope after the policy introduction | 0.03 | -31 | 31 | 0.99 |

Durbin–Watson statistic (original) = 1.15; Durbin–Watson statistic (transformed) = 1.50

**Supplementary Table 7**. Monthly changes in the occurrence among patients aged younger than six years who were hospitalized for asthma between April 2017 and November 2020 using the interrupted time-series analysis with the intervention of February 2019

| The monthly occurrence among patients aged younger than six years who were hospitalized for asthma between April 2017 and November 2020 using the interrupted time-series analysis with the intervention of February 2019 | Coefficient | 95% confidence interval | | *p* |
| --- | --- | --- | --- | --- |
| Slope before the introduction | 0.3 | -1.7 | 2.3 | 0.75 |
| Level change after the policy introduction | 2.5 | -22 | 27 | 0.84 |
| Slope change of the policy | -2.7 | -6.0 | 0.6 | 0.11 |
| Slope after the policy introduction | -2.4 | -4.2 | -0.5 | <0.01 |

Durbin–Watson statistic (original) = 0.63; Durbin–Watson statistic (transformed) = 1.54

**Supplementary Table 8.** Monthly changes in the occurrence among patients aged younger than six years who received medication for severe asthma at outpatient settings between April 2017 and November 2020 using the interrupted time-series analysis with the intervention of February 2019

| The monthly occurrence among patients aged younger than six years who received medication for severe asthma at outpatient settings between April 2017 and November 2020 using the interrupted time-series analysis with the intervention of February 2019 | Coefficient | 95% confidence interval | | *p* |
| --- | --- | --- | --- | --- |
| Slope before the policy introduction | 6.3 | -16 | 28 | 0.57 |
| Level change after the policy introduction | 87 | -194 | 367 | 0.54 |
| Slope change of the policy | -40 | -74 | -6 | 0.02 |
| Slope after the policy introduction | -33 | -52 | -15 | <0.01 |

Durbin–Watson statistic (original) = 0.75; Durbin–Watson statistic (transformed) = 1.49

**Supplementary Table 9**. Baseline characteristics of patients whose parents had smoking habits

| **Characteristics** | **Hospitalization for asthma** | | **Medication for severe asthma at outpatient settings** | |
| --- | --- | --- | --- | --- |
| All, n(%) | 795 | (100.0) | 10,454 | (100.0) |
| Age (years), n (%) |  |  |  |  |
| 0 | 114 | (14.3) | 298 | (2.9) |
| 1 | 232 | (29.2) | 846 | (8.1) |
| 2 | 137 | (17.2) | 857 | (8.2) |
| 3 | 88 | (11.1) | 2,229 | (21.3) |
| 4 | 61 | (7.7) | 2,317 | (22.2) |
| 5 | 91 | (11.4) | 2,074 | (19.8) |
| 6 | 72 | (9.1) | 1,833 | (17.5) |
| Sex, n (%) |  |  |  |  |
| Boy | 485 | (61.0) | 5,860 | (56.1) |
| Fiscal year, n (%) |  |  |  |  |
| 2018 | 426 | (53.6) | 5,375 | (51.4) |
| 2019 | 369 | (46.4) | 5,079 | (48.6) |

**Supplementary Table 10**. The monthly number and occurrence of patients whose parents had smoking habits between May 2018 and March 2020

| Time (month, year) | Total population aged younger than six years, n | Hospitalization for asthma | | Medication for severe asthma at outpatient settings | |
| --- | --- | --- | --- | --- | --- |
| n | /100,000 | n | /100,000 |
| May 2018 | 28,586 | 38 | 130 | 410 | 1430 |
| June 2018 | 28,486 | 39 | 140 | 436 | 1530 |
| July 2018 | 28,381 | 39 | 140 | 414 | 1460 |
| August 2018 | 28,252 | 44 | 160 | 392 | 1390 |
| September 2018 | 28,113 | 60 | 210 | 588 | 2090 |
| October 2018 | 27,956 | 50 | 180 | 776 | 2780 |
| November 2018 | 27,843 | 29 | 100 | 577 | 2070 |
| December 2018 | 27,732 | 38 | 140 | 525 | 1890 |
| January 2019 | 27,565 | 26 | 900 | 328 | 1190 |
| February 2019 | 27,446 | 24 | 900 | 430 | 1570 |
| March 2019 | 27,235 | 39 | 140 | 499 | 1830 |
| April 2019 | 27,058 | 36 | 130 | 503 | 1860 |
| May 2019 | 26,934 | 29 | 110 | 388 | 1440 |
| June 2019 | 26,813 | 27 | 100 | 405 | 1510 |
| July 2019 | 26,650 | 32 | 120 | 428 | 1610 |
| August 2019 | 26,486 | 39 | 150 | 332 | 1250 |
| September 2019 | 26,296 | 50 | 190 | 511 | 1940 |
| October 2019 | 26,124 | 38 | 150 | 573 | 2190 |
| November 2019 | 26,026 | 33 | 130 | 496 | 1910 |
| December 2019 | 25,856 | 29 | 110 | 448 | 1730 |
| January 2020 | 25,695 | 24 | 90 | 328 | 1280 |
| February 2020 | 25,550 | 17 | 70 | 365 | 1430 |
| March 2020 | 25,389 | 15 | 60 | 302 | 1190 |

**Supplementary Fig. 1** Change in the yearly smoking proportion between 2017 and 2021


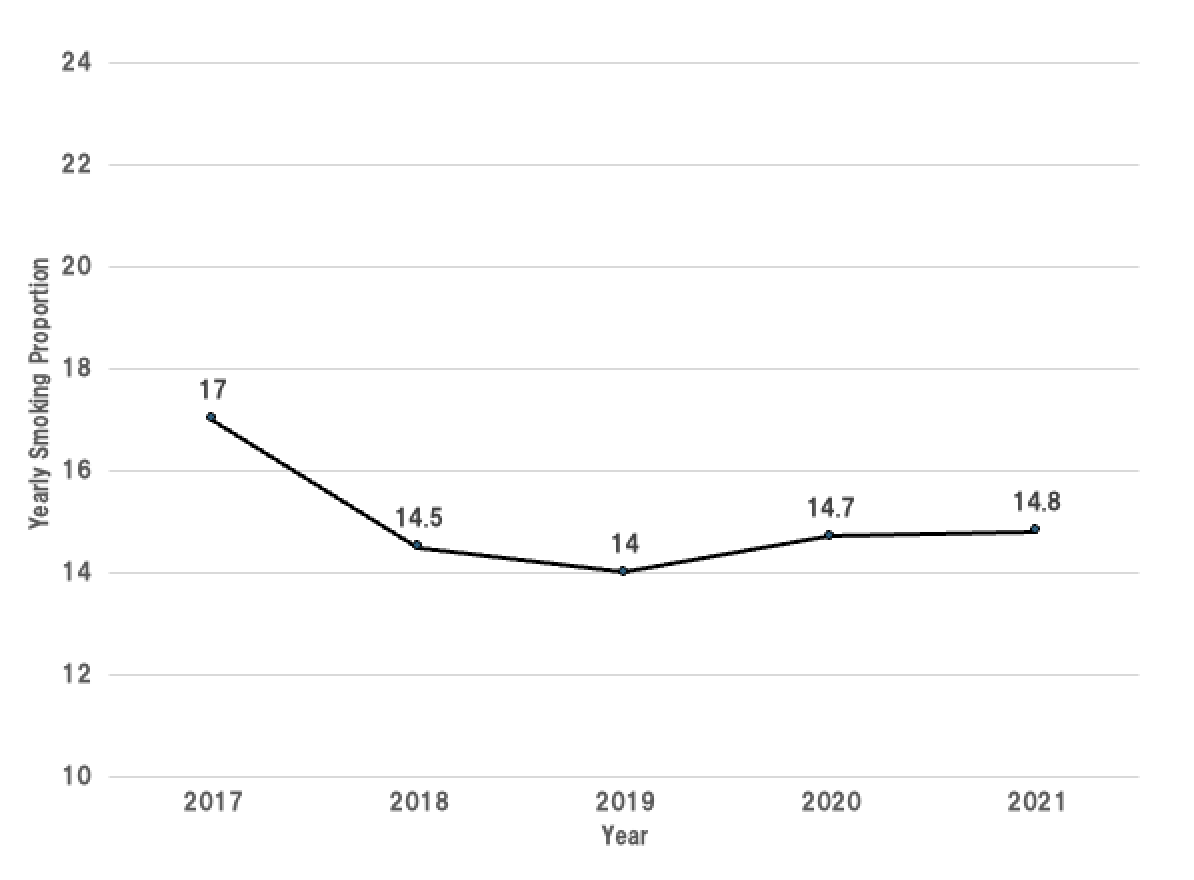


**Supplementary Fig. 2** Monthly changes in the occurrence among patients aged younger than six years who were hospitalized for asthma between May 2018 and March 2020


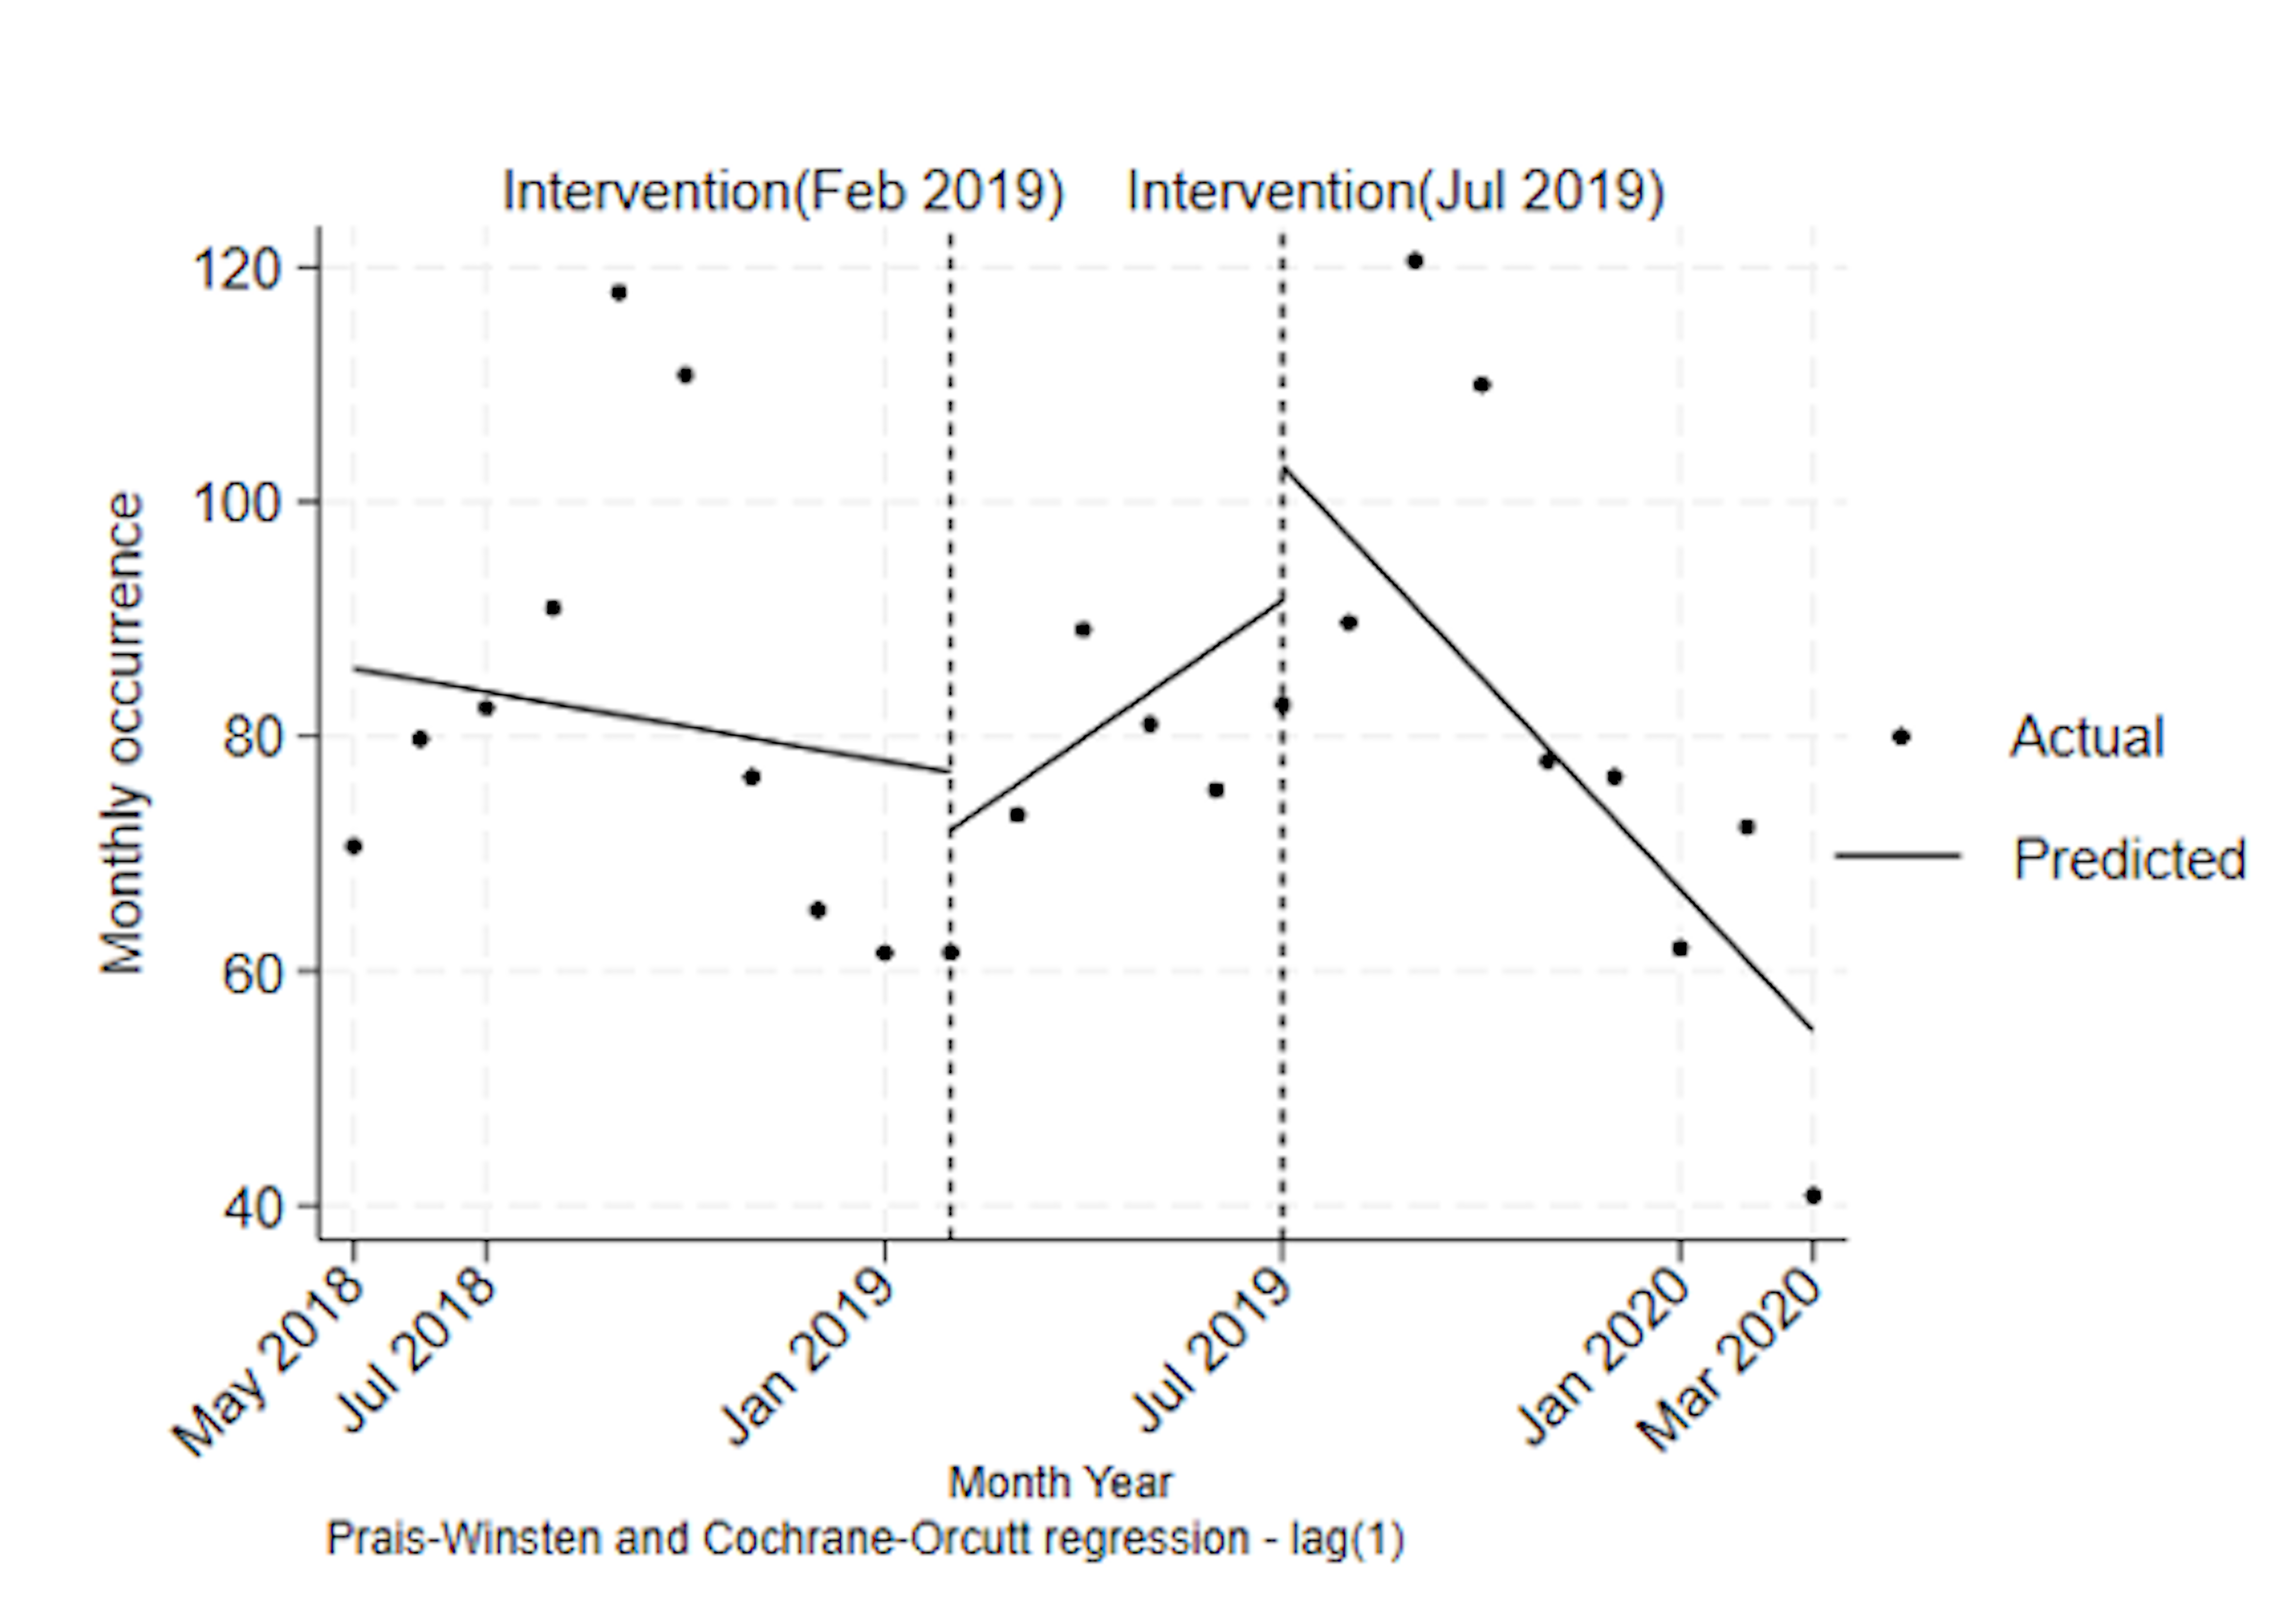


Interrupted time-series analysis was used to analyze monthly data among patients aged younger than six years who were hospitalized for asthma (between May 2018 and March 2020) to evaluate the first policy introduced in February 2019 and the second policy introduced on July 2019. A Prais–Winsten linear regression model was fitted to account for autocorrelation. The horizontal axis represents time, and the vertical axis represents the monthly occurrence. Black dots and black lines represent the actual and predicted monthly occurrence, respectively. The dashed line indicates when the policies were introduced.

**Supplementary Fig. 3** Monthly changes in the occurrence among patients aged younger than six years who received medication for severe asthma at outpatient settings between May 2018 and March 2020

**
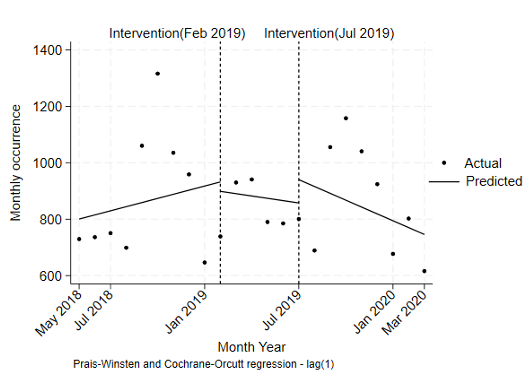
**

Interrupted time-series analysis was used to analyze monthly data among patients aged younger than six years who received medication for severe asthma at outpatient settings (between May 2018 and March 2020) to evaluate the first policy introduced in February 2019 and the second policy introduced on July 2019. A Prais–Winsten linear regression model was fitted to account for autocorrelation. The horizontal axis represents time, and the vertical axis represents the monthly occurrence. Black dots and black lines represent the actual and predicted monthly occurrence, respectively. The dashed line indicates when the policies were introduced.

**Supplementary Fig. 4** Monthly changes in the occurrence among patients aged younger than six years who were hospitalized for asthma between June 2018 and February 2020


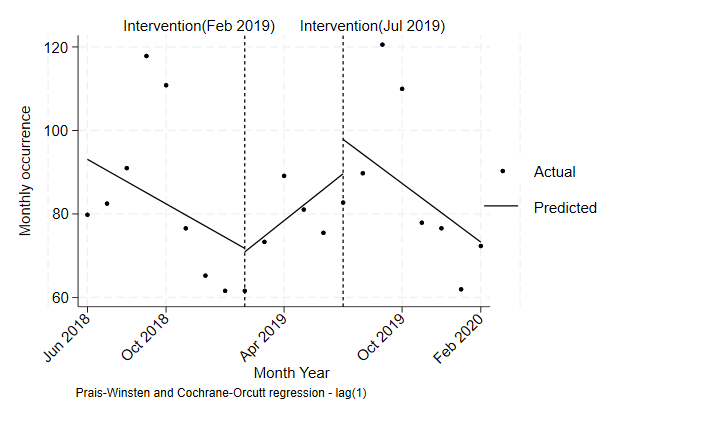


Interrupted time-series analysis was used to analyze monthly data among patients aged younger than six years who were hospitalized for asthma (between June 2018 and February 2020) to evaluate the first policy introduced in February 2019 and the second policy introduced in July 2019. A Prais–Winsten linear regression model was fitted to account for autocorrelation. The horizontal axis represents time, and the vertical axis represents the monthly occurrence. Black dots and black lines represent the actual and predicted monthly occurrence, respectively. The dashed line indicates when the policies were introduced.

**Supplementary Fig. 5** Monthly changes in the occurrence among patients aged younger than six years who received medication for severe asthma at outpatient settings between June 2018 and February 2020


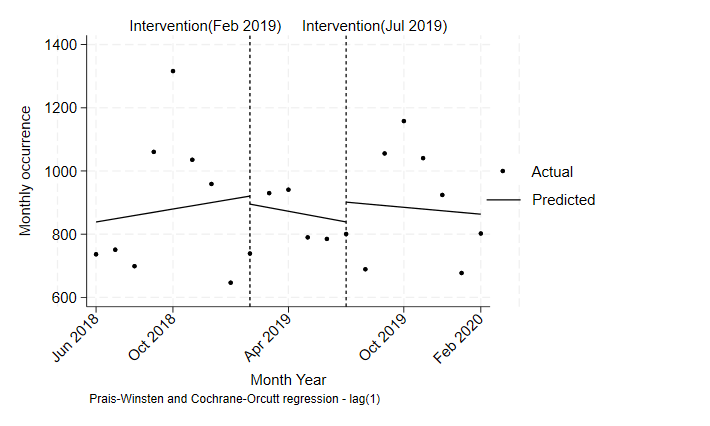


Interrupted time-series analysis was used to analyze monthly data among patients aged younger than six years who received medication for severe asthma at outpatient settings (between June 2018 and February 2020) to evaluate the first policy introduced in February 2019 and the second policy introduced in July 2019. A Prais–Winsten linear regression model was fitted to account for autocorrelation. The horizontal axis represents time, and the vertical axis represents the monthly occurrence. Black dots and black lines represent the actual and predicted monthly occurrence, respectively. The dashed line indicates when the policies were introduced.

**Supplementary Fig. 6** Monthly changes in the occurrence among patients aged younger than six years who were hospitalized for asthma between April 2017 and September 2019 using the interrupted time-series analysis with the intervention of July 2018


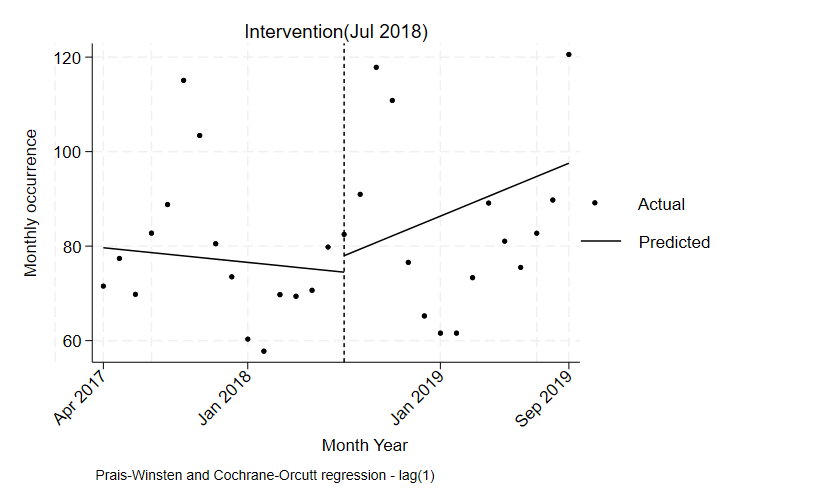


Interrupted time-series analysis was used to analyze monthly data among patients aged younger than six years who were hospitalized for asthma (between April 2017 and September 2019) to evaluate the policy introduced in July 2018. A Prais–Winsten linear regression model was fitted to account for autocorrelation. The horizontal axis represents time, and the vertical axis represents the monthly occurrence. Black dots and black lines represent the actual and predicted monthly occurrence, respectively. The dashed line indicates when the policies were introduced.

**Supplementary Fig. 7** Monthly changes in the occurrence among patients aged younger than six years who received medication for severe asthma at outpatient settings between April 2017 and September 2019 using the interrupted time-series analysis with the intervention of July 2018

**
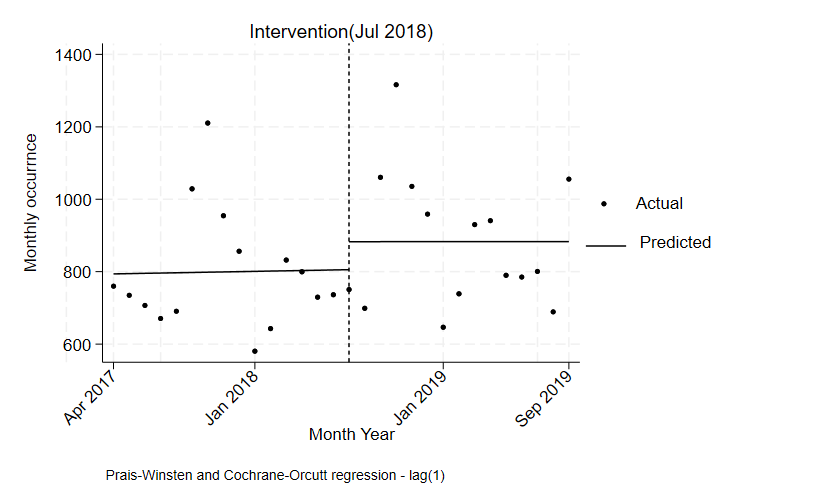
**

Interrupted time-series analysis was used to analyze monthly data among patients aged younger than six years who received medication for severe asthma at outpatient settings (between April 2017 and September 2019) to evaluate the policy introduced in July 2018. A Prais–Winsten linear regression model was fitted to account for autocorrelation. The horizontal axis represents time, and the vertical axis represents the monthly occurrence. Black dots and black lines represent the actual and predicted monthly occurrence, respectively. The dashed line indicates when the policies were introduced.

**Supplementary Fig. 8** Monthly changes in the occurrence among patients aged younger than six years who were hospitalized for asthma between April 2017 and November 2020 using the interrupted time-series analysis with the intervention of February 2019


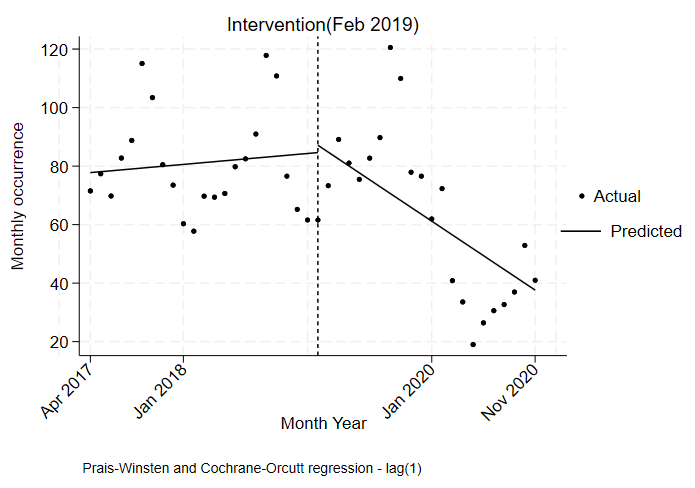


Interrupted time-series analysis was used to analyze monthly data among patients aged younger than six years who were hospitalized for asthma (between April 2017 and November 2020) to evaluate the policy introduced in February 2019. A Prais–Winsten linear regression model was fitted to account for autocorrelation. The horizontal axis represents time, and the vertical axis represents the monthly occurrence. Black dots and black lines represent the actual and predicted monthly occurrence, respectively. The dashed line indicates when the policies were introduced.

**Supplementary Fig. 9** Monthly changes in the occurrence among patients aged younger than six years who received medication for severe asthma at outpatient settings between April 2017 and November 2020 using the interrupted time-series analysis with the intervention of February 2019

**
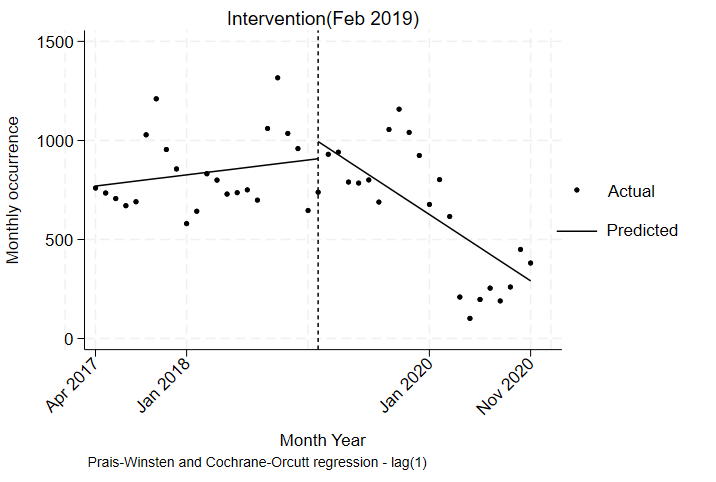
**

Interrupted time-series analysis was used to analyze monthly data among patients aged younger than six years who received medication for severe asthma at outpatient settings (between April 2017 and November 2020) to evaluate the policy introduced in February 2019. A Prais–Winsten linear regression model was fitted to account for autocorrelation. The horizontal axis represents time, and the vertical axis represents the monthly occurrence. Black dots and black lines represent the actual and predicted monthly occurrence, respectively. The dashed line indicates when the policies were introduced.

**Supplementary Fig. 10** Monthly changes in the occurrence among patients aged younger than six years who were hospitalized for asthma and whose parents had smoking habits between May 2018 and March 2020


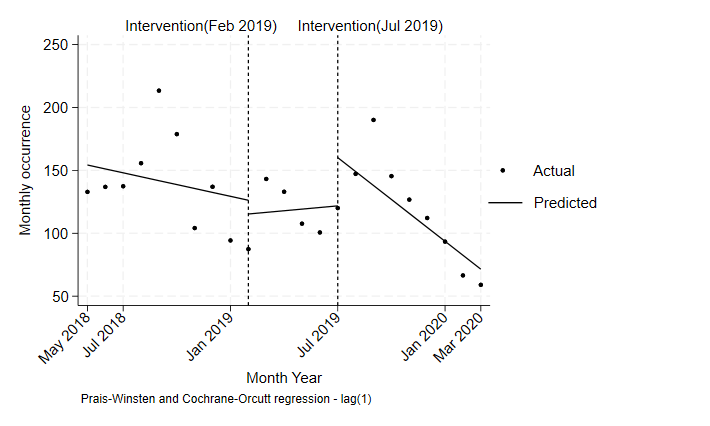


Interrupted time-series analysis was used to analyze monthly data among patients aged younger than six years who were hospitalized for asthma and whose parents had smoking habits (between May 2018 and March 2020) to evaluate the first policy introduced in February 2019 and the second policy introduced in July 2019. A Prais–Winsten linear regression model was fitted to account for autocorrelation. The horizontal axis represents time, and the vertical axis represents the monthly occurrence. Black dots and black lines represent the actual and predicted monthly occurrence, respectively. The dashed line indicates when the policies were introduced.

**Supplementary Fig. 11** Monthly changes in the occurrence among patients aged younger than six years who received medication for severe asthma at outpatient settings and whose parents had smoking habits between May 2018 and March 2020


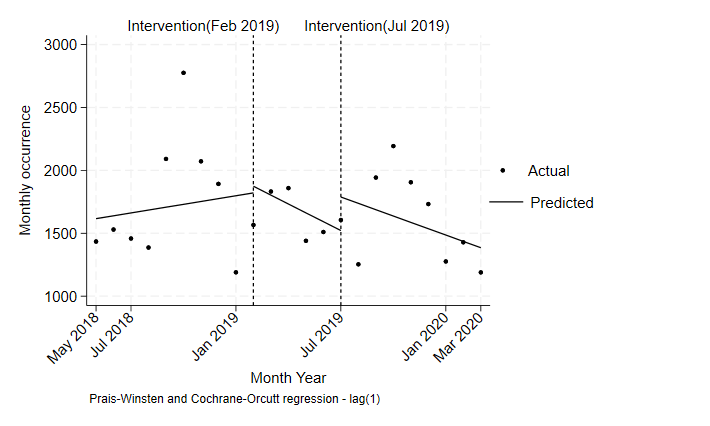


Interrupted time-series analysis was used to analyze monthly data among patients aged younger than six years who received medication for severe asthma at outpatient settings and whose parents had smoking habits (between May 2018 and March 2020) to evaluate the first policy introduced in February 2019 and the second policy introduced in July 2019. A Prais–Winsten linear regression model was fitted to account for autocorrelation. The horizontal axis represents time, and the vertical axis represents the monthly occurrence. Black dots and black lines represent the actual and predicted monthly occurrence, respectively. The dashed line indicates when the policies were introduced.
